# Supplementary material for: A strong zero-phonon line red phosphor BaNbF7:Mn4+for white LEDs
Source: Royal Society of Chemistry journal article supplement (doi:10.1039/d0qi00522c), 2020-01-01
Supplement: d0qi00522c1.pdf [file d0qi00522c1.pdf]

## A Strong Zero-Phonon Line red phosphor $\text{BaNbF}_7:\text{Mn}^{4+}$ for White LEDs

Yang Zhou <sup>a</sup>, Xiaoming Wang <sup>a\*</sup>, Cuiping Wang <sup>a</sup>, Yonggang Wang <sup>b</sup>, Fan Dou<sup>c</sup> and Huan Jiao <sup>a\*</sup>

<sup>a</sup>Key Laboratory of Macromolecular Science of Shaanxi Province, Shaanxi Key Laboratory for Advanced Energy Devices, Shaanxi Engineering Laboratory for Advanced Energy Technology, School of Chemistry & Chemical Engineering, Shaanxi Normal University, Xi'an 710062, Shaanxi Province, P. R. China.

<sup>b</sup>Center for High-Pressure Science and Technology Advanced Research (HPSTAR), Beijing 100094, China

<sup>c</sup>Yantai Shield Materials Technology Co.,Ltd.,Development Zone,Yantai 264006, Shandong Province, P. R. China.

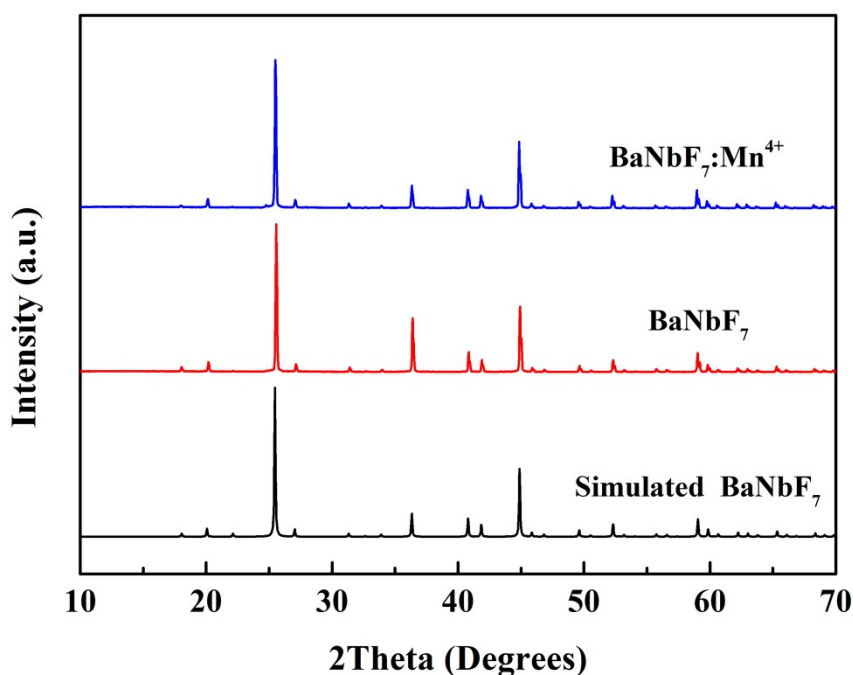

**Figure. S1.** XRD patterns of  $\text{BaNbF}_7$  and  $\text{BaNbF}_7:\text{Mn}^{4+}$  (0.8mol%  $\text{Mn}^{4+}$ )

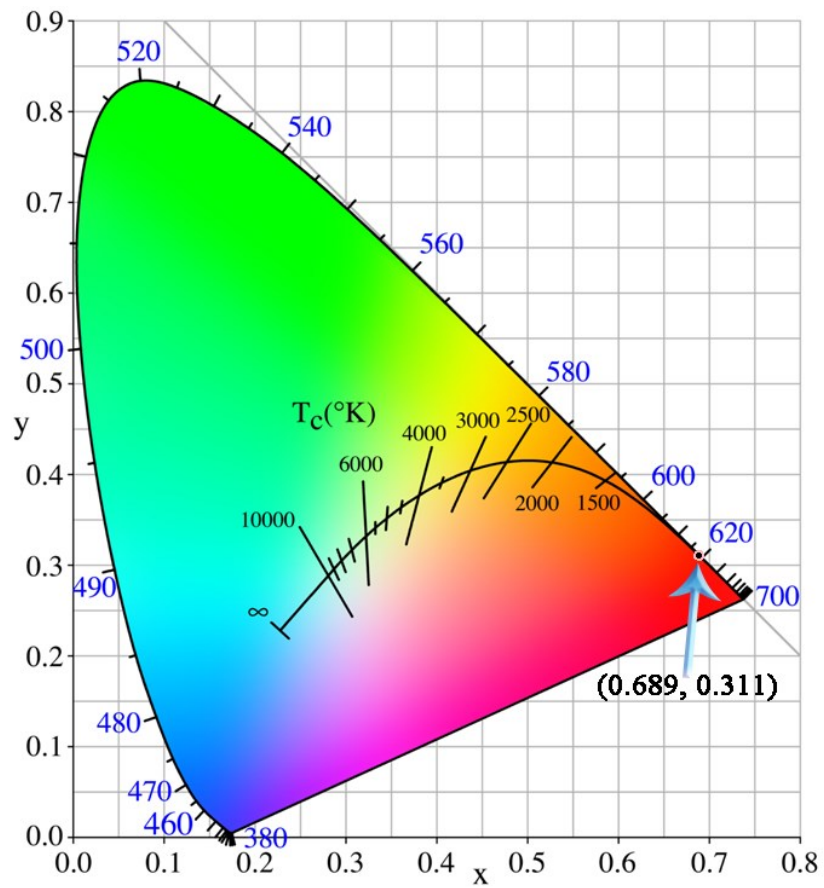

**Figure. S2.** CIE chromaticity diagram of BaNbF7: Mn<sup>4+</sup>.

**Table S1.** Atomic displacement parameters ( $\text{\AA}^2$ ) of the  $\text{BaNbF}_7$ 

| Atom | $U^{11}$    | $U^{22}$    | $U^{33}$    | $U^{12}$    | $U^{13}$     | $U^{23}$     |
|------|-------------|-------------|-------------|-------------|--------------|--------------|
| Ba1  | 0.0094 (4)  | 0.0094 (4)  | 0.0094 (4)  | 0.0004 (2)  | -0.0004 (2)  | -0.0004 (2)  |
| Ba2  | 0.0112 (4)  | 0.0112 (4)  | 0.0112 (4)  | 0.0012 (2)  | -0.0012 (2)  | -0.0012 (2)  |
| Nb   | 0.0106 (3)  | 0.0106 (3)  | 0.0106 (3)  | 0.0001 (3)  | 0.0001 (3)   | -0.0001 (3)  |
| F1   | 0.0150 (13) | 0.0150 (13) | 0.0150 (13) | 0.0001 (17) | 0.0001 (17)  | -0.0001 (17) |
| F2   | 0.0127 (19) | 0.0138 (18) | 0.0175 (19) | 0.0006 (16) | -0.0028 (17) | -0.0066 (18) |
| F3   | 0.0164 (19) | 0.017 (2)   | 0.0136 (18) | 0.0016 (17) | -0.0008 (17) | -0.0032 (17) |

**Table S2.** Selected bond length and bond angles of  $\text{BaNbF}_7$  based on the crystallographic data

| Bond      | Length/ $\text{\AA}$ | Bond      | Length/ $\text{\AA}$ |
|-----------|----------------------|-----------|----------------------|
| Ba1-F2    | 2.782(4)             | Ba1-F3    | 2.842(4)             |
| Ba2-F1    | 2.818(4)             | Ba2-F3    | 2.714(4)             |
| Nb-F1     | 1.922(4)             | Nb-F2     | 1.914(4)             |
| Nb-F3     | 2.011(4)             |           |                      |
| Bond      | Bond angle/ $^\circ$ | Bond      | Bond angle/ $^\circ$ |
| F2-Ba1-F2 | 60.06(10)            | F2-Ba1-F3 | 63.17(10)            |
| F2-Ba1-F3 | 64.41(10)            | F3-Ba1-F3 | 52.85(10)            |
| F1-Ba2-F3 | 67.89(10)            | F3-Ba2-F3 | 73.30(10)            |
| F1-Nb-F2  | 78.1(2)              | F1-Nb-F3  | 1334.4(2)            |
| F2-Nb-F2  | 115.9(2)             | F2-Nb-F3  | 78.56(15)            |
| F2-Nb-F3  | 76.79(15)            | F3-Nb-F3  | 77.94(14)            |

**Figure. E1.** Varshni equation as follows:

$$E(T) = E_0 - \frac{aT^2}{T + b} \quad (1)$$

Where  $E(T)$  is the energy difference between the excited state and the ground state at temperature T.
